# Supplementary material
Source: PubMed Central journal article supplement (PMC9729683)
Supplement: 10433_2021_651_MOESM1_ESM.pdf [file 10433_2021_651_MOESM1_ESM.pdf]

**Corresponding author: Raluca E. Buia**  
 Email: [elenabui@unive.it](mailto:elenabui@unive.it)

**European Journal of Ageing, SHARE COVID-19 Special Section**

**Supplementary Material**

Table 1. Descriptive statistics

|                                                | N. Obs. | Mean  | SD    | Min | Max |
|------------------------------------------------|---------|-------|-------|-----|-----|
| <b>Work interruption (<i>outcome 1</i>)</b>    | 7619    | 0.179 | 0.383 | 0   | 1   |
| <b>Week of interruption (<i>outcome 2</i>)</b> |         |       |       |     |     |
| No interruptions (=0)                          | 7619    | 0.821 | 0.383 | 0   | 1   |
| 1 to 8 weeks of interruption (=1)              | 7619    | 0.107 | 0.309 | 0   | 1   |
| More than 8 weeks of interruption (=2)         | 7619    | 0.072 | 0.258 | 0   | 1   |
| Age                                            | 7619    | 60.45 | 5.055 | 33  | 86  |
| Female                                         | 7619    | 0.557 | 0.497 | 0   | 1   |
| Level of education:                            |         |       |       |     |     |
| <i>Lower than high school</i>                  | 7606    | 0.128 | 0.334 | 0   | 1   |
| <i>High school</i>                             | 7606    | 0.417 | 0.493 | 0   | 1   |
| <i>Higher than high school</i>                 | 7606    | 0.455 | 0.498 | 0   | 1   |
| Major illness                                  | 7615    | 0.079 | 0.270 | 0   | 1   |
| IT-skills level:                               |         |       |       |     |     |
| <i>High IT-skills</i>                          | 6894    | 0.263 | 0.441 | 0   | 1   |
| <i>Medium IT-skills</i>                        | 6894    | 0.566 | 0.496 | 0   | 1   |
| <i>Low IT-skills</i>                           | 6894    | 0.170 | 0.376 | 0   | 1   |
| Employee or self-employed:                     |         |       |       |     |     |
| <i>Private employee</i>                        | 7616    | 0.515 | 0.500 | 0   | 1   |
| <i>Public employee</i>                         | 7616    | 0.350 | 0.477 | 0   | 1   |
| <i>Self-employed</i>                           | 7616    | 0.136 | 0.342 | 0   | 1   |
| Essential jobs                                 | 7619    | 0.378 | 0.485 | 0   | 1   |
| Remote working feasibility index               | 7619    | 0.312 | 0.400 | 0   | 1   |
| Social interaction index                       | 7619    | 0.727 | 0.315 | 0   | 1   |

Data: preliminary SHARE wave 8 release 0. Conclusions are preliminary. Notes: the outcome variable 2 (weeks of interruption) is a categorical variable taking the value of 0 if respondents continued working, value 1 if they experienced a "short" interruption (between 1 and 8 weeks) or value 2 if they stopped working for more than 8 weeks.

Table 2. Number of observations by country

| Country        | Freq. | Percent | Cum.   |
|----------------|-------|---------|--------|
| Germany        | 536   | 7.04    | 7.04   |
| Sweden         | 221   | 2.90    | 9.94   |
| Spain          | 94    | 1.23    | 11.17  |
| Italy          | 410   | 5.38    | 16.55  |
| France         | 216   | 2.84    | 19.39  |
| Denmark        | 483   | 6.34    | 25.73  |
| Greece         | 333   | 4.37    | 30.10  |
| Switzerland    | 284   | 3.73    | 33.82  |
| Belgium        | 633   | 8.31    | 42.13  |
| Israel         | 240   | 3.15    | 45.28  |
| Czech Republic | 254   | 3.33    | 48.62  |
| Poland         | 572   | 7.51    | 56.12  |
| Luxembourg     | 77    | 1.01    | 57.13  |
| Portugal       | 122   | 1.60    | 58.73  |
| Slovenia       | 230   | 3.02    | 61.75  |
| Estonia        | 1,014 | 13.31   | 75.06  |
| Croatia        | 222   | 2.91    | 77.98  |
| Lithuania      | 338   | 4.44    | 82.41  |
| Bulgaria       | 182   | 2.39    | 84.80  |
| Cyprus         | 84    | 1.10    | 85.90  |
| Finland        | 374   | 4.91    | 90.81  |
| Latvia         | 184   | 2.42    | 93.23  |
| Malta          | 103   | 1.35    | 94.58  |
| Romania        | 147   | 1.93    | 96.51  |
| Slovakia       | 266   | 3.49    | 100.00 |
| Total          | 7,619 | 100.00  |        |

Data: Preliminary SHARE wave 8 release 0. Conclusions are preliminary.

Table 3. Remote working feasibility and social interaction indexes by ISCO08 2-digit codes

| ISCO08 2-digit | Occupation                                                     | Remote work feasibility index | Social interaction index |
|----------------|----------------------------------------------------------------|-------------------------------|--------------------------|
| 11             | Chief Executives, Senior Officials and Legislators             | 0,972                         | 0,826                    |
| 12             | Administrative and Commercial Managers                         | 0,923                         | 0,505                    |
| 13             | Production and Specialized Services Managers                   | 0,693                         | 0,513                    |
| 14             | Hospitality, Retail and Other Services Managers                | 0,698                         | 0,932                    |
| 21             | Science and Engineering Professionals                          | 0,584                         | 0,194                    |
| 22             | Health Professionals                                           | 0                             | 1                        |
| 23             | Teaching Professionals                                         | 0,427                         | 0,875                    |
| 24             | Business and Administration Professionals                      | 0,901                         | 0,330                    |
| 25             | Information and Communications Technology Professionals        | 1                             | 0                        |
| 26             | Legal, Social and Cultural Professionals                       | 0,530                         | 0,895                    |
| 32             | Health Associate Professionals                                 | 0,067                         | 0,944                    |
| 33             | Business and Administration Associate Professionals            | 0,783                         | 0,750                    |
| 34             | Legal, Social, Cultural and Related Associate Professionals    | 0,236                         | 0,963                    |
| 35             | Information and Communications Technicians                     | 0,852                         | 0,570                    |
| 41             | General and Keyboard Clerks                                    | 1                             | 0,557                    |
| 42             | Customer Services Clerks                                       | 0,478                         | 0,942                    |
| 43             | Numerical and Material Recording Clerks                        | 0,554                         | 0,677                    |
| 44             | Other Clerical Support Workers                                 | 0,245                         | 0,850                    |
| 51             | Personal Services Workers                                      | 0,012                         | 0,889                    |
| 52             | Sales Workers                                                  | 0,142                         | 1                        |
| 53             | Personal Care Workers                                          | 0,005                         | 1                        |
| 54             | Protective Services Workers                                    | 0                             | 1                        |
| 61             | Market-oriented Skilled Agricultural Workers                   | 0                             | 0,452                    |
| 62             | Market-oriented Skilled Forestry, Fishery and Hunting Workers  | 0                             | 0,268                    |
| 63             | Subsistence Farmers, Fishers, Hunters and Gatherers            | 0                             | 0,558                    |
| 71             | Building and Related Trades Workers (excluding Electricians)   | 0                             | 0,909                    |
| 72             | Metal, Machinery and Related Trades Workers                    | 0                             | 0,304                    |
| 73             | Handicraft and Printing Workers                                | 0,095                         | 0,280                    |
| 74             | Electrical and Electronic Trades Workers                       | 0                             | 0,975                    |
| 75             | Food Processing, Woodworking, Garment and Other Craft and...   | 0                             | 0,748                    |
| 81             | Stationary Plant and Machine Operators                         | 0                             | 0,272                    |
| 82             | Assemblers                                                     | 0                             | 0,444                    |
| 83             | Drivers and Mobile Plant Operators                             | 0                             | 0,792                    |
| 91             | Cleaners and Helpers                                           | 0                             | 0,389                    |
| 92             | Agricultural, Forestry and Fishery Labourers                   | 0                             | 0,933                    |
| 93             | Labourers in Mining, Construction, Manufacturing and Transport | 0                             | 0,823                    |
| 94             | Food Preparation Assistants                                    | 0                             | 1                        |
| 95             | Street and Related Sales and Services Workers                  | 1                             | 1                        |
| 96             | Refuse Workers and Other Elementary Workers                    | 0,009                         | 0,957                    |

Data: Preliminary SHARE wave 8 release 0. Conclusions are preliminary. Notes: the two indexes have been generated on ISCO08 2-digit codes. Code 32 (Science and Engineering Associate Professionals) is missing.

Table 4. Tobit regression model – Weeks of interruption

|                                  | <i>Baseline model</i> | <i>Full model</i>    |
|----------------------------------|-----------------------|----------------------|
| Essential Jobs                   | -3.180***<br>(0.515)  | -1.529***<br>(0.545) |
| Remote work feasibility index    | -6.038***<br>(0.680)  | -3.886***<br>(0.744) |
| Social interaction index         | 0.609<br>(0.721)      | 1.940**<br>(0.753)   |
| Essential_RemoteWorkIndex        | Yes                   | Yes                  |
| Essential_SocialInteractionIndex | Yes                   | Yes                  |
| Country dummies                  | Yes                   | Yes                  |
| Additional covariates            | No                    | Yes                  |
| N                                | 7619                  | 6878                 |
| Pseudo-r2                        | 0.0437                | 0.0515               |
| Log pseudolikelihood             | -7314.13              | -6646.81             |

Data: Preliminary SHARE wave 8 release 0. Conclusions are preliminary. Notes: in the *baseline* model 6269 observations are left-censored, while 1350 are uncensored. In the *full* model 5636 observations are left-censored, while 1242 are uncensored. (\* p<0.1, \*\*p<0.05, \*\*\*p<0.01)

**Fig. 1** Sample composition by age group and country

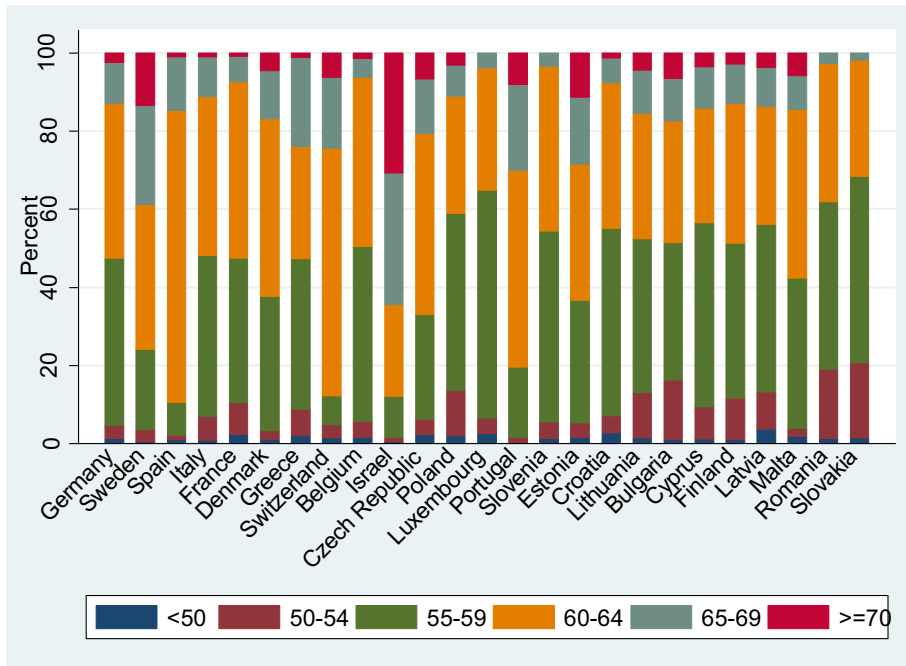

Data: Preliminary SHARE wave 8 release 0. Conclusions are preliminary
